# Supplementary material for: A SARS-CoV-2 Spike Ferritin Nanoparticle Vaccine Is Protective and Promotes a Strong Immunological Response in the Cynomolgus Macaque Coronavirus Disease 2019 (COVID-19) Model
Source: MDPI journal article supplement (doi:10.3390/vaccines10050717), 2022-05-04
Supplement: s1 [file s1]

## Supplementary Materials for

A SARS-CoV-2 Spike Ferritin Nanoparticle Vaccine is Protective and Promotes a Strong Immunological Response in the Cynomolgus Macaque Coronavirus Disease 2019 (COVID-19) Model

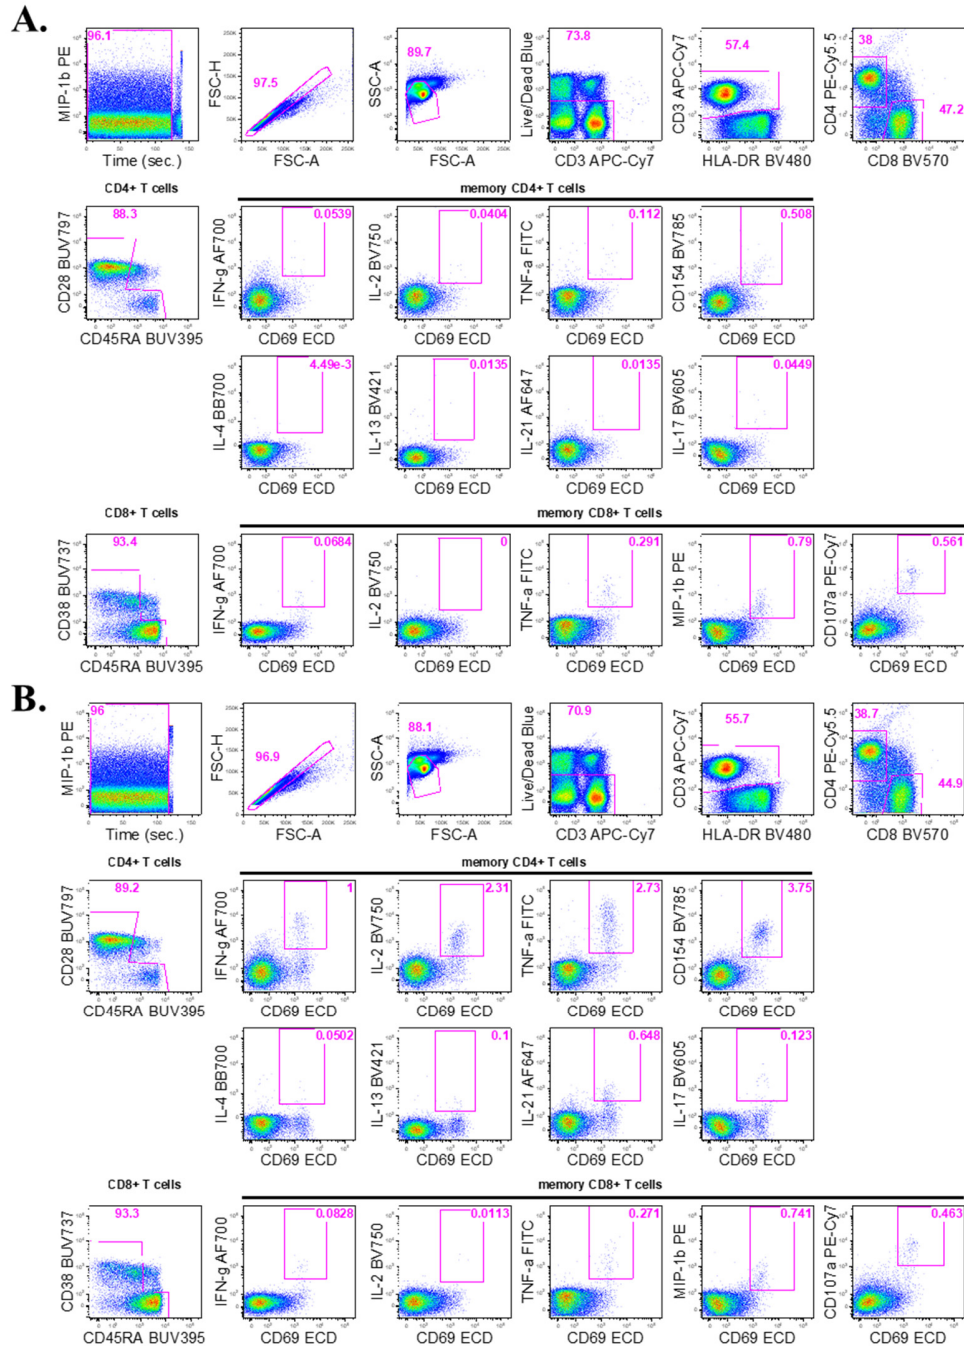

**Figure S1. Representative FACS staining and gating strategy for T cell ICS.** Flow cytometry gating applied to macaque PBMC T cell ICS data. FACS plots depict staining following stimulation with DMSO (A) or SARS-CoV-2 spike peptide pool #1 (B) for a representative animal at study week 6 following two immunizations with 50  $\mu$ g SpFN adjuvanted with ALFQ. Sequential gates were applied from left to right (top row) to identify CD4+ and CD8+ T cells. Cytokine production was measured in total memory CD4+ (middle) and CD8+ (bottom) T cells by excluding the naïve CD28+ CD45RA+ population. Cytokine-positive cells were identified by co-expression of CD69.

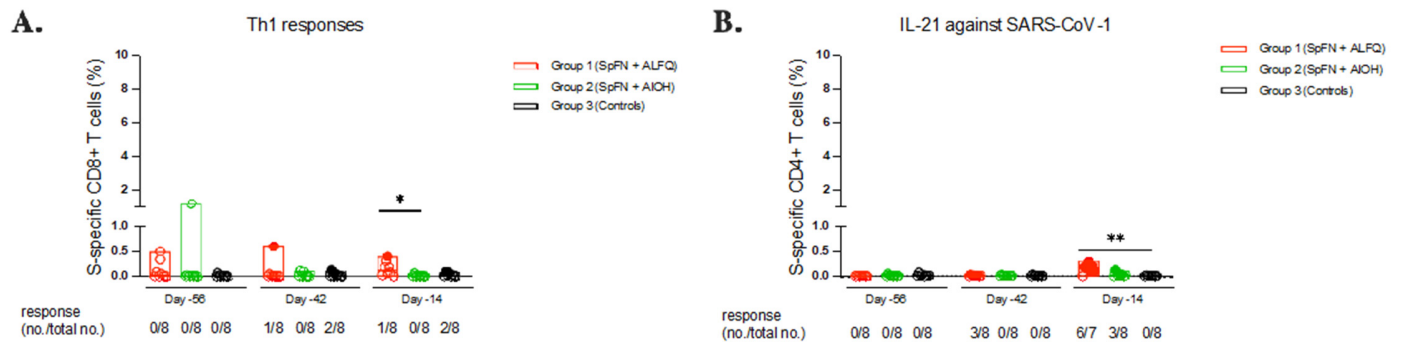

**Figure S2. SARS-CoV-2 and SARS-CoV-1 S-specific CD8 and CD4 T cell responses elicited by adjuvanted SpFN vaccination.** T cell responses were assessed by SARS-CoV-2 or SARS-CoV-1 spike peptide pool stimulation and intracellular cytokine staining of PBMC collected at study day -56 (pre-immune), study day -42 (2 weeks post-prime) and study day -14 (2 weeks post-boost). (A) SARS-CoV-2 S-specific memory CD8+ T cells expressing one or more Th1 cytokines (IFN- $\gamma$ , TNF- $\alpha$ , and IL-2) is shown. (B) SARS-CoV-1 S-specific memory CD4+ T cells expressing IL-21 is shown. The fraction of animals within each group with a positive response following each vaccination is indicated. Significant differences between groups was assessed using a Kruskal-Wallis test followed by a Dunn's post-test (\* $p < 0.05$ , \*\* $p < 0.01$ ).

**Table S1. Origin and Physical Information**

| CM# | Group# | Vaccine      | Species                    | Origin | Gender | Approximate Age (years) at Time of Challenge | Weight (kg) at Time of Challenge |
|-----|--------|--------------|----------------------------|--------|--------|----------------------------------------------|----------------------------------|
| 2   | 1      | SpFN + ALFQ  | <i>Macaca fascicularis</i> | Asian  | M      | 7.7                                          | 5.979                            |
| 5   | 1      | SpFN + ALFQ  | <i>Macaca fascicularis</i> | Asian  | F      | 5.6                                          | 2.935                            |
| 7   | 1      | SpFN + ALFQ  | <i>Macaca fascicularis</i> | Asian  | M      | 5.8                                          | 5.566                            |
| 8   | 1      | SpFN + ALFQ  | <i>Macaca fascicularis</i> | Asian  | F      | 5.7                                          | 4.836                            |
| 9   | 1      | SpFN + ALFQ  | <i>Macaca fascicularis</i> | Asian  | M      | 5.7                                          | 3.884                            |
| 14  | 1      | SpFN + ALFQ  | <i>Macaca fascicularis</i> | Asian  | F      | 6.0                                          | 3.449                            |
| 21  | 1      | SpFN + ALFQ  | <i>Macaca fascicularis</i> | Asian  | F      | 5.3                                          | 3.086                            |
| 24  | 1      | SpFN + ALFQ  | <i>Macaca fascicularis</i> | Asian  | M      | 7.6                                          | 11.91                            |
| 1   | 2      | SpFN + AIOH3 | <i>Macaca fascicularis</i> | Asian  | F      | 5.7                                          | 2.908                            |
| 3   | 2      | SpFN + AIOH3 | <i>Macaca fascicularis</i> | Asian  | F      | 7.0                                          | 3.352                            |
| 4   | 2      | SpFN + AIOH3 | <i>Macaca fascicularis</i> | Asian  | M      | 5.4                                          | 4.199                            |
| 6   | 2      | SpFN + AIOH3 | <i>Macaca fascicularis</i> | Asian  | F      | 8.4                                          | 3.297                            |
| 10  | 2      | SpFN + AIOH3 | <i>Macaca fascicularis</i> | Asian  | M      | 5.7                                          | 7.126                            |
| 16  | 2      | SpFN + AIOH3 | <i>Macaca fascicularis</i> | Asian  | M      | 5.4                                          | 7.731                            |
| 18  | 2      | SpFN + AIOH3 | <i>Macaca fascicularis</i> | Asian  | M      | 5.7                                          | 4.341                            |
| 23  | 2      | SpFN + AIOH3 | <i>Macaca fascicularis</i> | Asian  | F      | 5.5                                          | 2.899                            |
| 11  | 3      | PBS          | <i>Macaca fascicularis</i> | Asian  | F      | 5.6                                          | 3.115                            |
| 12  | 3      | PBS          | <i>Macaca fascicularis</i> | Asian  | M      | 8.2                                          | 9.099                            |
| 13  | 3      | PBS          | <i>Macaca fascicularis</i> | Asian  | F      | 5.7                                          | 2.864                            |
| 15  | 3      | PBS          | <i>Macaca fascicularis</i> | Asian  | F      | 6.3                                          | 3.426                            |
| 17  | 3      | PBS          | <i>Macaca fascicularis</i> | Asian  | M      | 5.7                                          | 4.303                            |
| 19  | 3      | PBS          | <i>Macaca fascicularis</i> | Asian  | F      | 5.1                                          | 3.439                            |
| 20  | 3      | PBS          | <i>Macaca fascicularis</i> | Asian  | M      | 9.5                                          | 8.778                            |
| 22  | 3      | PBS          | <i>Macaca fascicularis</i> | Asian  | M      | 5.6                                          | 5.667                            |

**Table S2. Summary of clinical disease findings**

| CM #                                          | 2     | 5  | 7     | 8      | 9 | 14 | 21     | 24 | 1     | 3     | 4     | 6  | 10 | 16 | 18    | 23 | 11    | 12 | 13    | 15     | 17    | 19    | 20 | 22 |
|-----------------------------------------------|-------|----|-------|--------|---|----|--------|----|-------|-------|-------|----|----|----|-------|----|-------|----|-------|--------|-------|-------|----|----|
| Group                                         | 1     | 1  | 1     | 1      | 1 | 1  | 1      | 1  | 2     | 2     | 2     | 2  | 2  | 2  | 2     | 2  | 3     | 3  | 3     | 3      | 3     | 3     | 3  | 3  |
| Euthanasia Day                                | 15    | 15 | 15    | 15     | 9 | 9  | 9      | 9  | 15    | 9     | 15    | 15 | 15 | 9  | 9     | 9  | 9     | 9  | 9     | 15     | 9     | 15    | 15 | 15 |
| Hyperpyrexia <sup>1</sup>                     |       |    |       |        |   |    |        |    |       |       |       |    |    |    |       |    |       |    | X     |        | X     |       | X  |    |
| Fever <sup>2</sup>                            |       |    |       |        | X | X  |        |    |       |       |       |    |    |    |       |    |       | X  | X     | X      | X     | X     | X  |    |
| Significantly Elevated Body Temp <sup>3</sup> | X     |    |       |        | X | X  |        | X  |       | X     |       |    |    |    |       |    | X     | X  | X     | X      | X     | X     | X  | X  |
| Diurnal Rhythm Disruption <sup>4</sup>        | X     |    | X     |        |   | X  |        |    |       | X     |       | X  |    |    |       |    |       |    |       |        |       |       |    |    |
| Mild Hypoxia <sup>5</sup>                     |       |    |       |        |   | X  |        | X  |       |       |       | X  |    |    |       |    |       |    |       |        |       |       | X  | X  |
| Tachycardia                                   |       | X  | X     | X      | X | X  | X      | X  |       |       | X     | X  | X  | X  | X     | X  |       | X  | X     | X      | X     | X     | X  | X  |
| Cough                                         |       |    |       | X      | X |    |        |    |       | X     |       |    |    |    |       |    |       | X  |       |        | X     |       |    |    |
| Increased Lung Opacity (# Affected Lobes)     | X (1) |    | X (1) | X (1)^ |   |    | X (1)^ |    |       | X (4) | X (1) |    |    |    | X (2) |    |       |    | X (2) | X (2+) | X (4) |       |    |    |
| Lung Infiltrates (# Affected Lobes)           |       |    |       |        |   |    |        |    | X (1) | X (2) |       |    |    |    |       |    | X (1) |    |       | X (1)  | X (4) | X (2) |    |    |
| Abdominal Component to Breathing              |       | X  |       |        |   | X  |        |    |       |       |       | X  |    |    |       |    | X     |    |       |        | X     |       |    |    |
| Piloerection                                  |       |    |       |        |   |    |        | X  | X     | X     |       | X  |    | X  | X     |    | X     | X  |       | X      | X     |       |    |    |
| Decreased Skin Turgor                         |       |    |       |        |   |    |        |    | X     |       |       |    | X  |    |       |    |       |    |       | X      |       | X     |    | X  |
| Lymphadenopathy                               |       |    |       | X      |   |    |        |    |       |       |       |    |    |    |       |    |       |    |       | X      |       | X     |    |    |
| Stool Not Fully Formed/Liquid                 |       |    | X     | X      | X |    |        |    |       | X     |       | X  | X  |    |       |    |       |    |       |        |       |       |    |    |
| Anorexia <sup>6</sup>                         |       | X  |       | X      |   |    |        |    | X     |       | X     | X  |    |    |       | X  | X     | X  |       | X      | X     |       |    |    |
| Reduced Consumption <sup>7</sup>              |       |    |       | X      | X |    |        |    | X     | X     | X     | X  |    | X  |       | X  | X     | X  |       | X      | X     |       |    |    |

\*Mild hypoxia is defined as 90–94% SpO<sub>2</sub>

<sup>1</sup>Defined as a temperature greater than or equal to 3.0°C above baseline by telemetry, with baseline being the mean of data from Study Days -7 through -1 for a particular animal

<sup>2</sup>Defined as a temperature greater than or equal to 1.5°C above baseline for a duration of greater than 2 hours by telemetry

<sup>3</sup>Defined as a temperature greater than 3 standard deviations above baseline for a duration of greater than 2 hours by telemetry.

<sup>4</sup>Defined as a significant activity increase during the dark cycle, or a significant activity decrease during the light cycle, compared to baseline as measured by telemetry

<sup>5</sup>Defined as 90–94% SpO<sub>2</sub>

<sup>6</sup>Defined as an absence of biscuit and enrichment consumption for one or more days OR an absence of biscuit consumption for 3 or more consecutive days

<sup>7</sup>Defined as either no evidence or notably reduced amounts of biscuit and/or fruit consumption for greater than or equal to 2 consecutive days

^Potential positional or rotational artifact

**Table S3. Summary of Major Histopathologic Findings in the Respiratory Tract**

| <b>Animal Number</b> | <b>Group</b> | <b>Alveolar inflammation</b>      | <b>Perivascular inflammation</b>              | <b>Peribronchiolar inflammation</b> | <b>Pleural inflammation and/or fibrosis</b> | <b>Nasal turbinate inflammation</b>       |
|----------------------|--------------|-----------------------------------|-----------------------------------------------|-------------------------------------|---------------------------------------------|-------------------------------------------|
| CM 2                 | 1            | None                              | Mild to moderate; 2 of 8 sections affected    | None                                | None                                        | Minimal; 2 of 6 sections affected         |
| CM 5                 | 1            | None                              | None                                          | None                                | None                                        | None                                      |
| CM 7                 | 1            | None                              | None                                          | None                                | None                                        | None                                      |
| CM 8                 | 1            | None                              | Minimal/1 of 8 sections affected              | None                                | None                                        | None                                      |
| CM 9                 | 1            | Minimal; 1 of 8 sections affected | Minimal to mild; 6 of 8 sections affected     | Mild; 2 of 8 sections affected      | Mild; 2 of 8 sections affected              | Minimal to mild; 2 of 6 sections affected |
| CM 14                | 1            | Minimal/1 of 8 sections affected  | Minimal to moderate; 3 of 8 sections affected | Mild/2 of 8 sections affected       | None                                        | None                                      |
| CM 21                | 1            | Minimal/2 of 8 sections affected  | Minimal/3 of 8 sections affected              | None                                | None                                        | Minimal/1 of 6 sections affected          |
| CM 24                | 1            | None                              | None                                          | None                                | None                                        | Minimal; 1 of 6 sections affected         |
| CM 1                 | 2            | None                              | Minimal/1 of 8 sections affected              | None                                | Minimal/1 of 8 sections affected            | Minimal - mild; 3 of 6 sections affected  |
| CM 3                 | 2            | None                              | Minimal/2 of 8 sections affected              | None                                | Minimal/1 of 8 sections affected            | None                                      |
| CM 4                 | 2            | Minimal; 1 of 8 sections affected | None                                          | None                                | Mild; 1 of 8 sections affected              | None                                      |
| CM 6                 | 2            | Mild; 1 of 8 sections affected    | Minimal - mild; 2 of 8 sections affected      | None                                | Mild/1 of 8 sections affected               | Mild - moderate; 3 of 6 sections affected |

**Table S3 (con't). Summary of Major Histopathologic Findings in the Respiratory Tract**

| <b>Animal Number</b> | <b>Group</b> | <b>Alveolar inflammation</b>                   | <b>Perivascular inflammation</b>              | <b>Peribronchiolar inflammation</b>        | <b>Pleural inflammation and/or fibrosis</b> | <b>Nasal turbinate inflammation</b>     |
|----------------------|--------------|------------------------------------------------|-----------------------------------------------|--------------------------------------------|---------------------------------------------|-----------------------------------------|
| CM 10                | 2            | None                                           | None                                          | None                                       | None                                        | None                                    |
| CM 16                | 2            | Minimal to mild; 2 of 8 sections affected      | Minimal to moderate; 4 of 8 sections affected | Mild to moderate; 2 of 8 sections affected | Mild; 2 of 8 sections affected              | None                                    |
| CM 18                | 2            | None                                           | Minimal to mild; 2 of 8 sections affected     | Mild; 1 of 8 sections affected             | None                                        | None                                    |
| CM 23                | 2            | None                                           | None                                          | None                                       | None                                        | Minimal/1 of 6 sections affected        |
| CM 11                | 3            | Minimal - moderate; 7 of 8 sections affected   | Mild - moderate; 2 of 8 sections affected     | Mild - moderate; 3 of 8 sections affected  | None                                        | None                                    |
| CM 12                | 3            | Minimal to mild; 4 of 8 sections affected      | Minimal to mild; 4 of 8 sections affected     | None                                       | None                                        | None                                    |
| CM 13                | 3            | Moderate/1 of 8 sections affected              | Minimal - moderate; 5 of 8 sections affected  | Mild/2 of 8 sections affected              | None                                        | Minimal/1 of 6 sections affected        |
| CM 15                | 3            | Mild; 1 of 8 sections affected                 | Moderate; 1 of 8 sections affected            | None                                       | None`                                       | Mild-moderate; 5 of 6 sections affected |
| CM 17                | 3            | Mild; 2 of 8 sections affected; fibrin present | Mild; 2 of 8 sections affected                | None                                       | Mild/1 of 8 sections affected               | None                                    |
| CM 19                | 3            | Minimal to mild; 2 of 8 sections affected      | Minimal - mild; 4 of 8 sections affected      | None                                       | None                                        | Minimal; 2 of 6 sections affected       |
| CM 20                | 3            | Mild; 1 of 8 sections affected                 | Mimial to mild; 4 of 8 sections affected      | None                                       | None                                        | Minimal - 1 of 6 sections affected      |
| CM 22                | 3            | None                                           | Minimal to mild; 2 of 8 sections affected     | None                                       | None                                        | None                                    |

**Table S4. Summary of histologic findings (excluding the lungs and nasal turbinates)**

| Animal Number | Group | Tracheobronchial Lymph Node                         | Axillary Lymph Node          | Inguinal Lymph Node        | Liver                                 | GI Tract                                                  | Other                                                                                                               |
|---------------|-------|-----------------------------------------------------|------------------------------|----------------------------|---------------------------------------|-----------------------------------------------------------|---------------------------------------------------------------------------------------------------------------------|
| CM 2          | 1     | Moderate lymphoid hyperplasia                       | Mild lymphoid hyperplasia    | Medullary fibrosis         | Hepatocyte atrophy, capsular fibrosis | Lymphoid hyperplasia of the ileocecolic lymph node        | Testicular atrophy, urinary bladder and prostate gland infiltrate, interstitial nephritis                           |
| CM 5          | 1     | Moderate lymphoid hyperplasia                       | Minimal lymphoid hyperplasia | Draining hemorrhage        |                                       | Stomach inflammation                                      | Urinary bladder infiltrate, ovarian cyst, skeletal muscle degeneration, necrosis and regeneration with inflammation |
| CM 7          | 1     |                                                     | Medullary fibrosis           | Medullary fibrosis         |                                       | Stomach inflammation                                      | Splenic lymphoid hyperplasia, prostate gland infiltrate                                                             |
| CM 8          | 1     | Mild lymphoid hyperplasia                           |                              |                            |                                       | Stomach inflammation                                      | Adrenal gland mineralization                                                                                        |
| CM 9          | 1     | Minimal lymphoid hyperplasia                        | Medullary fibrosis           |                            |                                       |                                                           | Heart, trachea and prostate infiltrate                                                                              |
| CM 14         | 1     | Mild lymphoid hyperplasia                           |                              |                            |                                       |                                                           | Interstitial nephritis, ovarian corpus amallacea                                                                    |
| CM 21         | 1     | Moderate lymphoid hyperplasia, medullary infiltrate |                              | Medullary fibrosis         |                                       | Stomach inflammation                                      | Tracheal infiltrate, mesenteric lymphoid hyperplasia                                                                |
| CM 24         | 1     |                                                     | Granulomatous inflammation   | Granulomatous inflammation |                                       | Cecal parasite                                            |                                                                                                                     |
| CM 1          | 2     | Marked lymphoid hyperplasia                         |                              |                            |                                       | Stomach inflammation, lymphoid hyperplasia ileocecolic LN | Splenic lymphoid hyperplasia, interstitial nephritis                                                                |
| CM 3          | 2     | Mild lymphoid hyperplasia                           |                              |                            | Lymphocytic infiltrate                |                                                           | Splenic lymphoid hyperplasia                                                                                        |
| CM 4          | 2     | Mild lymphoid hyperplasia                           | Medullary fibrosis           |                            | Lymphocytic infiltrate                | Stomach inflammation, GALT lymphoid hyperplasia           | Splenic lymphoid hyperplasia, tracheal infiltrate                                                                   |



**Table S4 (con't). Summary of histologic findings (excluding the lungs and nasal turbinates)**

| Animal Number | Group | Tracheobronchial Lymph Node                | Axillary Lymph Node                  | Inguinal Lymph Node                     | Liver                                    | GI Tract                                                                  | Other                                                                           |
|---------------|-------|--------------------------------------------|--------------------------------------|-----------------------------------------|------------------------------------------|---------------------------------------------------------------------------|---------------------------------------------------------------------------------|
| CM 6          | 2     |                                            | Mild lymphoid hyperplasia            |                                         | Lymphocytic infiltrate                   | Stomach inflammation, lymphoid hyperplasia esophagus, duodenal infiltrate | Ovarian corpora amylacea                                                        |
| CM 10         | 2     |                                            | Medullary fibrosis                   | Medullary fibrosis, draining hemorrhage |                                          | Peyer's patch lymphoid hyperplasia                                        | Infiltrate in heart, urinary bladder and prostate gland; interstitial nephritis |
| CM 16         | 2     |                                            | Reticuloendothelial cell hyperplasia | Medullary fibrosis, draining hemorrhage |                                          |                                                                           | Lymphoid hyperplasia in kidney, prostate gland infiltrate                       |
| CM 18         | 2     | Lymphoid hyperplasia, medullary infiltrate | Lymphoid hyperplasia                 | Medullary fibrosis                      |                                          | Ileal and cecal parasite                                                  | Infiltrate in heart, prostate gland and sciatic nerve                           |
| CM 23         | 2     |                                            |                                      |                                         |                                          | Stomach inflammation                                                      | Ovarian mineralization                                                          |
| CM 11         | 3     |                                            | Minimal lymphoid hyperplasia         |                                         |                                          |                                                                           | Skeletal muscle regeneration                                                    |
| CM 12         | 3     |                                            |                                      | Draining hemorrhage                     |                                          | Stomach inflammation                                                      | Skeletal muscle degeneration & necrosis with inflammation                       |
| CM 13         | 3     | Mild lymphoid hyperplasia                  |                                      |                                         |                                          |                                                                           | Thyroid gland infiltrate                                                        |
| CM 15         | 3     | Mild lymphoid hyperplasia                  |                                      |                                         | Neutrophilic and eosinophilic infiltrate | Esophageal and cecal infiltrate, lymphoid hyperplasia ileocecal LN        | Heart degeneration with inflammation, urinary bladder and kidney infiltrate,    |
| CM 17         | 3     | Mild lymphoid hyperplasia                  |                                      |                                         | Mononuclear infiltrate                   | Stomach inflammation, cecal parasite                                      | Prostate gland infiltrate                                                       |
| CM 19         | 3     | Mild lymphoid hyperplasia                  |                                      |                                         |                                          |                                                                           | Interstitial nephritis                                                          |
| CM 20         | 3     | Minimal lymphoid hyperplasia               |                                      |                                         |                                          |                                                                           | Infiltrate in urinary bladder and corpus striatum                               |
| CM 22         | 3     | Minimal lymphoid hyperplasia               |                                      | Medullary fibrosis                      |                                          | Infiltrate in esophagus, cecal parasite                                   | Heart infiltrate, interstitial nephritis                                        |

**Table S5. Summary of clinical pathology findings – Vaccination Phase**

| CM #   | 2 | 5 | 7 | 8 | 9 | 14 | 21 | 24 | 1 | 3 | 4 | 6 | 10 | 16 | 18 | 23 | 11 | 12 | 13 | 15 | 17 | 19 | 20 | 22 |
|--------|---|---|---|---|---|----|----|----|---|---|---|---|----|----|----|----|----|----|----|----|----|----|----|----|
| Group  | 1 | 1 | 1 | 1 | 1 | 1  | 1  | 1  | 2 | 2 | 2 | 2 | 2  | 2  | 2  | 2  | 3  | 3  | 3  | 3  | 3  | 3  | 3  | 3  |
| ↑ WBC  |   |   |   |   |   |    |    |    |   |   | X |   |    |    |    |    |    |    |    |    |    |    |    |    |
| ↑ NEUT |   |   |   |   |   |    |    |    |   |   | X |   |    | X  |    |    |    |    |    |    |    |    |    |    |
| ↑ EOS  |   |   |   |   |   |    |    |    |   |   | X |   |    |    |    |    |    |    |    |    |    |    |    |    |
| ↑ BAS  |   |   |   |   |   |    |    |    |   |   | X |   |    |    |    |    |    |    |    |    |    |    |    |    |
| ↑ LYM  |   | X |   |   |   |    |    | X  |   |   |   |   |    |    |    |    |    |    | X  |    |    |    |    | X  |
| ↑ MON  |   | X |   |   |   |    |    |    |   |   |   |   |    |    |    |    |    |    | X  |    |    |    | X  |    |
| ↑ ALT  |   | X |   |   |   |    |    |    | X |   |   |   |    |    |    | X  |    | X  |    |    |    |    |    |    |
| ↓ ALB  |   |   |   |   |   | X  |    |    |   |   |   |   |    |    |    |    |    |    |    |    |    |    |    |    |
| ↑ ALP  |   |   |   |   |   |    |    |    |   |   | X |   |    |    |    |    |    |    |    |    |    |    |    |    |
| ↑ AST  |   | X |   |   |   |    |    | X  |   |   |   |   |    |    |    |    |    |    |    |    |    |    | X  |    |
| ↑ AMY  |   |   |   | X |   |    |    |    |   |   |   |   |    |    |    |    |    |    |    |    |    |    |    |    |
| ↑ BUN  |   | X |   |   |   |    |    |    |   |   |   |   |    |    |    |    | X  |    |    |    |    |    |    |    |
| ↑ CRE  |   |   |   |   |   |    | X  |    |   |   |   |   |    |    |    |    |    |    |    |    |    |    |    |    |
| ↑ TBIL |   |   |   |   |   |    |    |    |   |   |   |   |    | X  |    |    |    |    |    |    |    |    |    |    |
| ↑ CK   |   | X | X |   |   | X  |    | X  |   | X | X | X | X  |    | X  | X  |    |    | X  | X  |    | X  | X  |    |
| ↑ CRP  |   |   |   |   |   | X  |    |    |   |   |   |   |    |    |    |    |    |    |    |    |    |    |    |    |

X = % change from baseline (Study Day -56) of ≥30%

30–49% Δ

50–69% Δ

70–99% Δ

100–499% Δ

>500%

**Table S6. Summary of clinical pathology findings – Challenge Phase**

| CM #    | 2 | 5 | 7 | 8 | 9 | 14 | 21 | 24 | 1 | 3 | 4 | 6 | 10 | 16 | 18 | 23 | 11 | 12 | 13 | 15 | 17 | 19 | 20 | 22 |
|---------|---|---|---|---|---|----|----|----|---|---|---|---|----|----|----|----|----|----|----|----|----|----|----|----|
| Group   | 1 | 1 | 1 | 1 | 1 | 1  | 1  | 1  | 2 | 2 | 2 | 2 | 2  | 2  | 2  | 2  | 3  | 3  | 3  | 3  | 3  | 3  | 3  | 3  |
| ↑ WBC   |   |   |   |   | X |    | X  |    | X | X | X | X |    | X  |    |    |    | X  |    | X  |    | X  | X  | X  |
| ↑ NEUT  | X |   |   |   | X |    | X  | X  | X | X | X | X |    | X  | X  |    |    |    | X  | X  |    | X  | X  | X  |
| ↑ EOS   | X |   | X | X | X |    | X  |    | X |   | X | X |    | X  | X  |    |    |    |    | X  | X  | X  | X  | X  |
| ↑ BAS   |   |   |   |   | X |    |    |    | X |   | X | X |    | X  |    |    |    |    |    | X  |    | X  | X  | X  |
| ↑ LYM   |   | X | X | X |   | X  | X  |    | X |   | X | X | X  |    |    |    |    | X  |    | X  |    | X  |    | X  |
| ↑ MON   |   | X | X | X | X | X  |    | X  | X | X | X |   | X  |    | X  |    | X  | X  |    | X  | X  | X  | X  | X  |
| ↓ PLT   |   |   | X | X |   |    |    |    |   |   | X |   |    |    |    | X  |    |    |    |    |    |    |    | X  |
| ↑ ALT   |   |   | X | X |   |    |    |    |   |   |   |   |    | X  |    | X  |    | X  | X  | X  |    |    |    |    |
| ↑ ALP   |   |   |   |   |   |    |    | X  |   |   |   |   |    |    |    |    | X  | X  | X  | X  |    | X  |    | X  |
| ↑ AST   | X |   | X |   |   |    |    | X  | X |   | X | X | X  | X  |    | X  | X  | X  | X  | X  | X  | X  |    |    |
| ↑ GGT   |   |   |   |   |   |    |    |    |   |   |   |   |    |    |    |    |    |    |    |    |    |    |    | X  |
| ↑ GLU   |   |   | X |   |   |    |    | X  |   |   |   |   |    |    |    |    |    |    |    |    |    |    |    |    |
| ↑/↓ AMY |   |   |   |   |   |    |    | X  |   |   |   |   |    |    |    |    | X  |    |    |    |    |    | X  |    |
| ↑ BUN   | X |   |   | X |   |    |    |    |   |   |   |   |    |    |    |    |    |    |    |    |    |    |    |    |
| ↑ CRE   |   | X | X |   |   | X  |    |    |   |   |   |   |    |    |    |    |    |    |    | X  |    |    |    |    |
| ↑ TBIL  |   |   |   |   |   |    |    | X  |   |   | X |   | X  |    |    |    | X  |    |    | X  |    |    | X  |    |
| ↑ CK    | X | X | X | X | X | X  | X  | X  | X | X | X | X | X  | X  | X  | X  |    | X  | X  | X  | X  | X  | X  |    |
| ↑ CRP   |   | X | X | X | X | X  |    | X  |   |   |   | X |    |    |    |    | X  | X  | X  | X  | X  | X  | X  |    |

X = % change from baseline (average of Study Days -4 and 1 per animal) of ≥30%

30-49% Δ

50-69% Δ

70-99% Δ

100-499% Δ

500-999% Δ

>1000% Δ
